# Supplementary material for: Species Profiles and Antimicrobial Resistance of Non-aureus Staphylococci Isolated from Healthy Broilers, Farm Environments, and Farm Workers
Source: PubMed Central journal article supplement — Food Sci Anim Resour. 2023 Sep 1;43(5):792–804. doi: 10.5851/kosfa.2023.e36 (PMC10493561; doi:10.5851/kosfa.2023.e36), 2023-09-01
Supplement: kosfa-43-5-792-suppl1.pdf [file kosfa-43-5-792-suppl1.pdf]

## Supplementary Materials

Table S1. Primers for non-*aureus* staphylococci QRDR detection

| Target genes                                                                   | Primer name          | Sequence (5'→3')            | Amplicon size (bp) |
|--------------------------------------------------------------------------------|----------------------|-----------------------------|--------------------|
| <i>gyrA</i>                                                                    | gyrA-F               | AATGAACAAGGTATGACACC        | 368                |
|                                                                                | gyrA-R               | GCGATACCTGATGCACCATT        |                    |
| PCR condition: 95°C 5 min+28×(95°C 30 sec+50°C 30 sec+72°C 40 sec)+72°C 5 min  |                      |                             |                    |
| <i>gyrB</i>                                                                    | gyrB-agnetis-F       | AGTGACACGTCGTAAGTCGG        | 612                |
|                                                                                | gyrB-agnetis-R       | TGAAGCATCGCACGGTTTTTC       |                    |
| PCR condition : 95°C 5 min+28×(95°C 30 sec+53°C 30 sec+72°C 40 sec)+72°C 5 min |                      |                             |                    |
|                                                                                | gyrB-arlettae-F      | TGGCTCGTGTCATTGTCGAA        | 790                |
|                                                                                | gyrB-arlettae-R      | GTCGCATACACTGCGTTGTC        |                    |
| PCR condition : 95°C 5 min+28×(95°C 30 sec+53°C 30 sec+72°C 40 sec)+72°C 5 min |                      |                             |                    |
|                                                                                | gyrB-chromogenes-F   | GAAACACGGGGACCCTCAAT        | 545                |
|                                                                                | gyrB-chromogenes-R   | TTCGATATGGGCACCATCG         |                    |
| PCR condition : 95°C 5 min+28×(95°C 30 sec+54°C 30 sec+72°C 40 sec)+72°C 5 min |                      |                             |                    |
|                                                                                | gyrB-cohnii-F        | AAA AAG CGC GTG AAG TGA CA  | 696                |
|                                                                                | gyrB-cohnii-R        | GGT TCT CAA CAA CAT CGC CC  |                    |
| PCR condition : 95°C 5 min+28×(95°C 30 sec+52°C 30 sec+72°C 40 sec)+72°C 5 min |                      |                             |                    |
|                                                                                | gyrB-condimenti-F    | CTG CCG GAG GGT CTA CAA AA  | 534                |
|                                                                                | gyrB-condimenti-R    | TAT CCG CTT CAA TCG CGT CT  |                    |
| PCR condition : 95°C 5 min+28×(95°C 30 sec+53°C 30 sec+72°C 40 sec)+72°C 5 min |                      |                             |                    |
|                                                                                | gyrB-epidermidis-F   | CAG CAT TAG ACG TTT CAA G   | 250                |
|                                                                                | gyrB-epidermidis-R   | CCA ATA CCC GTA CCA AAT GC  |                    |
| PCR condition : 95°C 5 min+28×(95°C 30 sec+55°C 30 sec+72°C 40 sec)+72°C 5 min |                      |                             |                    |
|                                                                                | gyrB-haemolyticus-F  | ACG TGA AGT GAC ACG TCG TA  | 410                |
|                                                                                | gyrB-haemolyticus-R  | ATC CCG CTT CGA TTA GTG GT  |                    |
| PCR condition : 95°C 5 min+28×(95°C 30 sec+52°C 30 sec+72°C 40 sec)+72°C 5 min |                      |                             |                    |
|                                                                                | gyrB-lentus-F        | AGAGCTCGTCTAGCAGCGAA        | 681                |
|                                                                                | gyrB-lentus-R        | CGTTTCGTCAGCTTCTATCGC       |                    |
| PCR condition : 95°C 5 min+28×(95°C 30 sec+54°C 30 sec+72°C 40 sec)+72°C 5 min |                      |                             |                    |
|                                                                                | gyrB-saprophyticus-F | GAA GTC ACG CGC CGT AAA TC  | 528                |
|                                                                                | gyrB-saprophyticus-R | CGA CCA TTT TGG CGT TGG TT  |                    |
| PCR condition : 95°C 5 min+28×(95°C 30 sec+53°C 30 sec+72°C 40 sec)+72°C 5 min |                      |                             |                    |
|                                                                                | gyrB-gallinarum-F    | AGT GAC ACG TCG TAA GTC GG  | 567                |
|                                                                                | gyrB-gallinarum-R    | TGA TCC GCG TTC ATC TCA CC  |                    |
| PCR condition : 95°C 5 min+28×(95°C 30 sec+54°C 30 sec+72°C 40 sec)+72°C 5 min |                      |                             |                    |
|                                                                                | gyrB-sciuri-F        | TAT CGT TGA GGG TGA CTC TGC | 426                |
|                                                                                | gyrB-sciuri-R        | TTC GGC GTT GAG CTA AGT TCT |                    |
| PCR condition : 95°C 5 min+28×(95°C 30 sec+53°C 30 sec+72°C 40 sec)+72°C 5 min |                      |                             |                    |
|                                                                                | gyrB-xylosus-F       | GGC AGA GAC TCG GAA ACA CA  | 442                |
|                                                                                | gyrB-xylosus-R       | CCC ACA ATT GGT CTG CGT TC  |                    |
| PCR condition : 95°C 5 min+28×(95°C 30 sec+53°C 30 sec+72°C 40 sec)+72°C 5 min |                      |                             |                    |

**Table S1. Primers for non-aureus staphylococci QRDR detection (continued)**

| Target genes                                                                   | Primer name                                                                    | Sequence (5'→3')            | Amplicon size (bp) |  |
|--------------------------------------------------------------------------------|--------------------------------------------------------------------------------|-----------------------------|--------------------|--|
| <i>parC</i>                                                                    | parC-agnetis-F                                                                 | TTACCTGATGTACGCGACGG        | 922                |  |
|                                                                                | parC-agnetis-R                                                                 | GTCGACCTTCACTGATCGCT        |                    |  |
|                                                                                | PCR condition : 95°C 5 min+28×(95°C 30 sec+54°C 30 sec+72°C 40 sec)+72°C 5 min |                             |                    |  |
|                                                                                | parC-arlettae-F                                                                | ACCCGATGTACGTGATGGTT        | 257                |  |
|                                                                                | parC-arlettae-R                                                                | ATAGCTGCTGCAGGGTCATT        |                    |  |
|                                                                                | PCR condition : 95°C 5 min+28×(95°C 30 sec+53°C 30 sec+72°C 40 sec)+72°C 5 min |                             |                    |  |
|                                                                                | parC-chromogenes-F                                                             | CGT CGG GGA TGT CAT TGG AC  | 162                |  |
|                                                                                | parC-chromogenes-R                                                             | GTA TAA CGC ATC GCA GCA GG  |                    |  |
|                                                                                | PCR condition : 95°C 5 min+28×(95°C 30 sec+50°C 30 sec+72°C 40 sec)+72°C 5 min |                             |                    |  |
|                                                                                | parC-cohnii-F                                                                  | TTG GCG ACC GAT TTG GTA GAT | 309                |  |
|                                                                                | parC-cohnii-R                                                                  | TAG CTG CTG CTG GAT CGT TA  |                    |  |
|                                                                                | PCR condition : 95°C 5 min+28×(95°C 30 sec+52°C 30 sec+72°C 40 sec)+72°C 5 min |                             |                    |  |
|                                                                                | parC-condimenti-F                                                              | AGT GCC AAA ACA GTC GGT GA  | 300                |  |
|                                                                                | parC-condimenti-R                                                              | GTT CGG GAA TCT TGC TGG GA  |                    |  |
|                                                                                | PCR condition : 95°C 5 min+28×(95°C 30 sec+54°C 30 sec+72°C 40 sec)+72°C 5 min |                             |                    |  |
|                                                                                | parC-epidermidis-F                                                             | TCG CAA TGT ATT CAA GTG GG  | 245                |  |
|                                                                                | parC-epidermidis-R                                                             | ATC GTT ATC GAT ACT ACC ATT |                    |  |
|                                                                                | PCR condition : 95°C 5 min+28×(95°C 30 sec+55°C 30 sec+72°C 40 sec)+72°C 5 min |                             |                    |  |
| parC-haemolyticus-F                                                            | AAG AGT GCG AAG ACA GTC GG                                                     | 470                         |                    |  |
| parC-haemolyticus-R                                                            | CCG CCA GTA GGG AAA TCT GG                                                     |                             |                    |  |
| PCR condition : 95°C 5 min+28×(95°C 30 sec+54°C 30 sec+72°C 40 sec)+72°C 5 min |                                                                                |                             |                    |  |
| parC-lentus-F                                                                  | ATCCAAGACCGAGCACTTCC                                                           | 575                         |                    |  |
| parC-lentus-R                                                                  | CCGGTAGGGAAATCAGGTCC                                                           |                             |                    |  |
| PCR condition : 95°C 5 min+28×(95°C 30 sec+54°C 30 sec+72°C 40 sec)+72°C 5 min |                                                                                |                             |                    |  |
| parC-saprophyticus-F                                                           | CGT TCG TGA TGG GCT CAA AC                                                     | 244                         |                    |  |
| parC-saprophyticus-R                                                           | AGC CGG GTC ATT GTC GAT AC                                                     |                             |                    |  |
| PCR condition : 95°C 5 min+28×(95°C 30 sec+54°C 30 sec+72°C 40 sec)+72°C 5 min |                                                                                |                             |                    |  |
| parC-sciuri-F                                                                  | GCG CTT CCT GAT GTA CGA GA                                                     | 375                         |                    |  |
| parC-sciuri-R                                                                  | CAT CGG CTC CAT CGC TGT AT                                                     |                             |                    |  |
| PCR condition : 95°C 5 min+28×(95°C 30 sec+54°C 30 sec+72°C 40 sec)+72°C 5 min |                                                                                |                             |                    |  |
| parC-xylosus-F                                                                 | CGC ACG GTG ATA CGT CTG TA                                                     | 428                         |                    |  |
| parC-xylosus-R                                                                 | ACC ACC CGT TGG GAA ATC AG                                                     |                             |                    |  |
| PCR condition : 95°C 5 min+28×(95°C 30 sec+54°C 30 sec+72°C 40 sec)+72°C 5 min |                                                                                |                             |                    |  |
| <i>parE</i>                                                                    | parE-F                                                                         | CGATTAAAGCACAACAAGCAAG      | 393                |  |
|                                                                                | parE-R                                                                         | GCGCACCATCAGTATCAG          |                    |  |
|                                                                                | PCR condition : 95°C 5 min+28×(95°C 30 sec+48°C 30 sec+72°C 40 sec)+72°C 5 min |                             |                    |  |
|                                                                                | parE-agnetis-F                                                                 | GGGTGGGTCTGCAAACTTG         | 308                |  |
|                                                                                | parE-agnetis-R                                                                 | GTAACGCGATAAACACGCGA        |                    |  |
|                                                                                | PCR condition : 95°C 5 min+28×(95°C 30 sec+52°C 30 sec+72°C 40 sec)+72°C 5 min |                             |                    |  |

**Table S1. Primers for non-aureus staphylococci QRDR detection (continued)**

| Target genes | Primer name                                                                    | Sequence (5'→3')                  | Amplicon size (bp) |
|--------------|--------------------------------------------------------------------------------|-----------------------------------|--------------------|
|              | parE-arlettae-F                                                                | TTAGGTACACCGGAAGCACG              | 566                |
|              | parE-arlettae-R                                                                | ACACGTCCTGCCAACAATAA              |                    |
|              | PCR condition : 95°C 5 min+28×(95°C 30 sec+53°C 30 sec+72°C 40 sec)+72°C 5 min |                                   |                    |
|              | parE-chromogenes-F                                                             | TAGGGACACCTGAAGCGAGA              | 851                |
|              | parE-chromogenes-R                                                             | ACGACGTGGGGCAACTTTAT              |                    |
|              | PCR condition : 95°C 5 min+28×(95°C 30 sec+53°C 30 sec+72°C 40 sec)+72°C 5 min |                                   |                    |
|              | parE-cohnii-F                                                                  | CCA ACA AGC AAG AGA GGC AG        | 696                |
|              | parE-cohnii-R                                                                  | ATC CAC TCA CGT CTA GGA GC        |                    |
|              | PCR condition : 95°C 5 min+28×(95°C 30 sec+53°C 30 sec+72°C 40 sec)+72°C 5 min |                                   |                    |
|              | parE-condimenti-F                                                              | TAC GCT CGT CGA ATT GGT GA        | 648                |
|              | parE-condimenti-R                                                              | TAC TTG GAT ATG CGC ACC GT        |                    |
|              | PCR condition: 95°C 5 min+28×(95°C 30 sec+53°C 30 sec+72°C 40 sec)+72°C 5 min  |                                   |                    |
|              | parE-epidermidis-F                                                             | AAG CTC AAC AAG CAC GCG AGG CTG   | 229                |
|              | parE-epidermidis-R                                                             | TTA AAG TCA GTA CCA ACA CCA GCA C |                    |
|              | PCR condition : 95°C 5 min+28×(95°C 30 sec+48°C 30 sec+72°C 40 sec)+72°C 5 min |                                   |                    |
|              | parE-lentus-F                                                                  | GCA AGA GCT GCC GTA GAT TC        | 483                |
|              | parE-lentus-R                                                                  | AGC ACC ATC TGT ATC GGC AT        |                    |
|              | PCR condition : 95°C 5 min+28×(95°C 30 sec+53°C 30 sec+72°C 40 sec)+72°C 5 min |                                   |                    |
|              | parE-saprophyticus-F                                                           | GCG TAC AAA AGA CGG GGG TA        | 701                |
|              | parE-saprophyticus-R                                                           | CAC CAT CCG TAT CCG CAT CA        |                    |
|              | PCR condition : 95°C 5 min+28×(95°C 30 sec+54°C 30 sec+72°C 40 sec)+72°C 5 min |                                   |                    |
|              | parE-sciuri-F                                                                  | GTG AAG CAG CGA GAA AAG CG        | 374                |
|              | parE-sciuri-R                                                                  | ATG CGC ACC ATC AGT ATC GG        |                    |
|              | PCR condition : 95°C 5 min+28×(95°C 30 sec+54°C 30 sec+72°C 40 sec)+72°C 5 min |                                   |                    |
|              | parE-xylosus-F                                                                 | TAG AGA AGC GGC GCG TAA AG        | 376                |
|              | parE-xylosus-R                                                                 | ATG CGC ACC ATC TGT ATC GG        |                    |
|              | PCR condition : 95°C 5 min+28×(95°C 30 sec+54°C 30 sec+72°C 40 sec)+72°C 5 min |                                   |                    |

QRDR, quinolone-resistance determining region; PCR, polymerase chain reaction.
